# Supplementary material for: Infant Vitamin D Supplements, Fecal Microbiota and Their Metabolites at 3 Months of Age in the CHILD Study Cohort
Source: MDPI journal article supplement (doi:10.3390/biom13020200), 2023-01-19
Supplement: s1 [file s1]

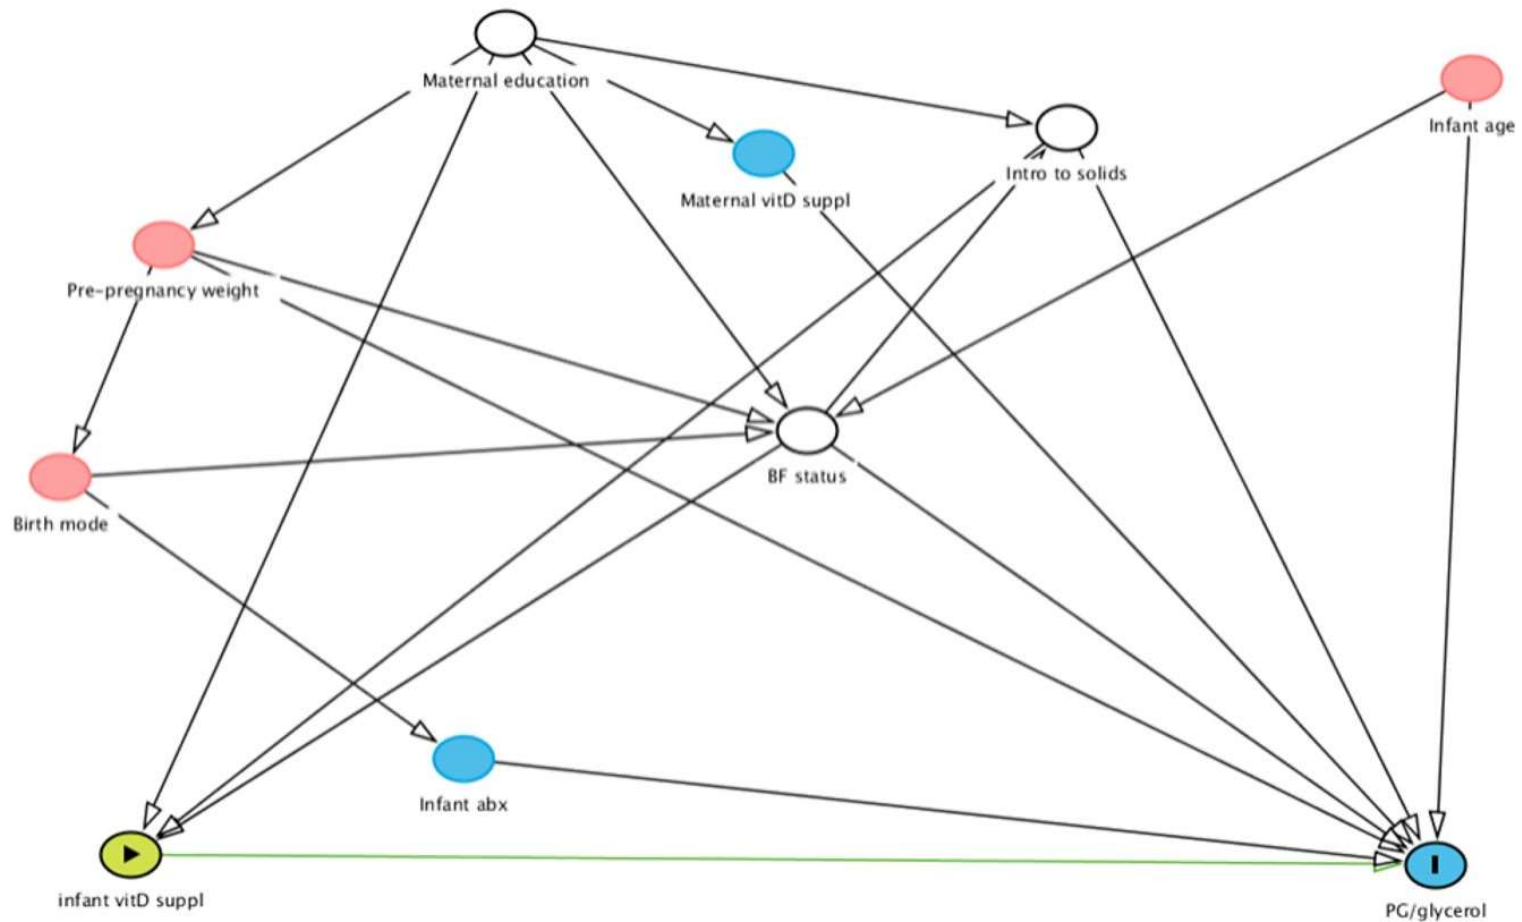

▶ exposure

I outcome

● ancestor of outcome

● ancestor of exposure and outcome

○ adjusted variable

— causal path
